# Supplementary material
Source: PubMed Central journal article supplement (PMC2527906)
Supplement: 0806522105_0806522105SI.pdf [file 0806522105_0806522105SI.pdf]

# Supporting Information

Hay *et al.* 10.1073/pnas.0806522105

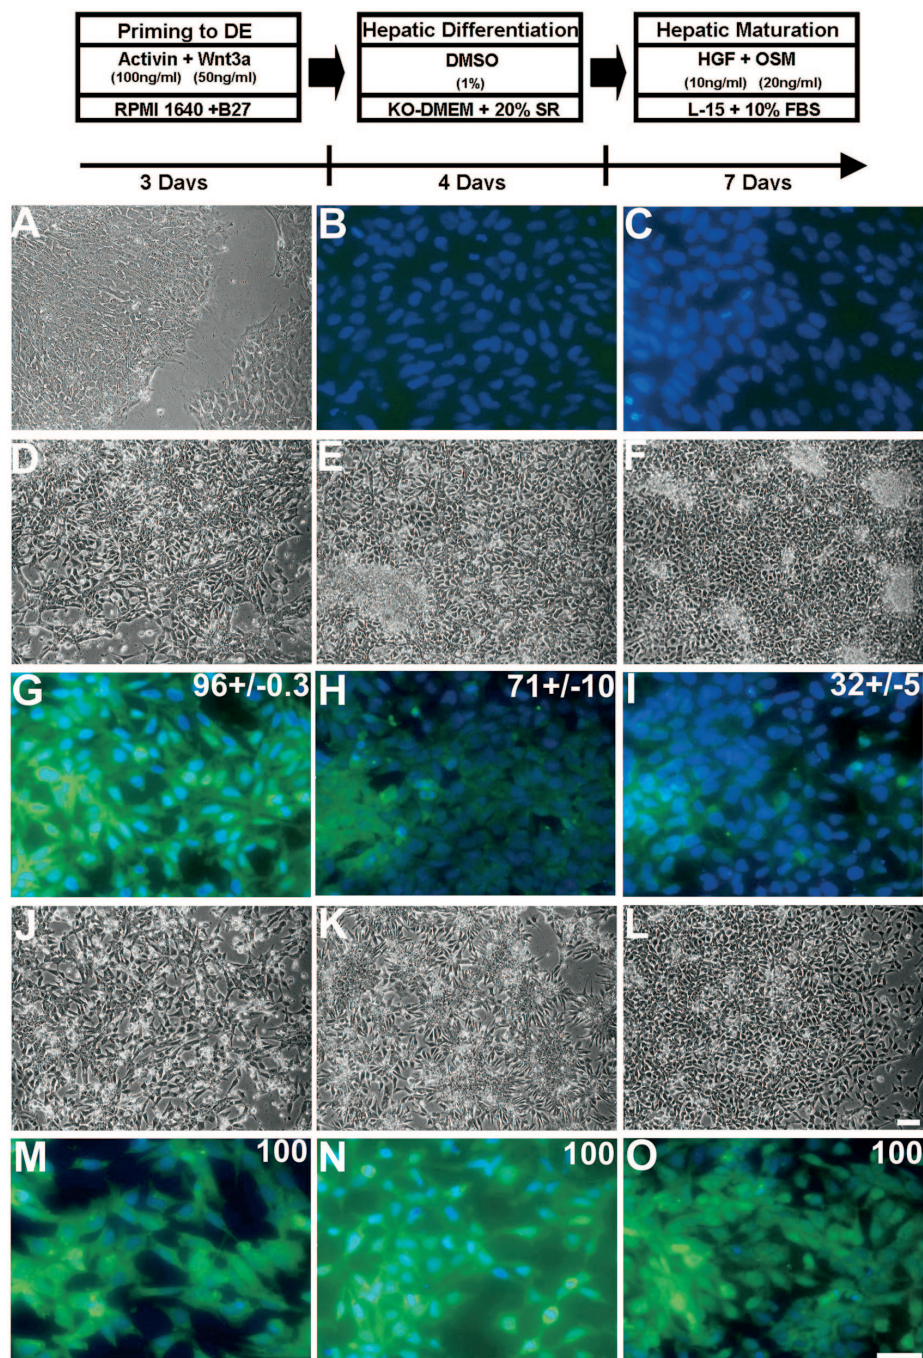

**Fig. S1.** AW promotes down-regulation of Brachyury in differentiating hESCs. The hESC differentiation protocol is shown at top. hESCs (A) exhibited a drastic change in cellular morphology in response to the different media. AW-differentiated cells rapidly formed a confluent monolayer (D–F) of cells exhibiting similar morphology. In contrast, AB-differentiated cells took longer to reach confluence (J–L). Consistent with different morphology, Brachyury gene expression was differently regulated in both conditions. hESCs did not express Brachyury (B). In contrast, cells differentiated with AW showed high levels of Brachyury at day 1, which decreased by day 3 (G–I). Cells treated with AB exhibited high-level Brachyury expression throughout the 72-h period (M–O). Specificity of staining was assessed using an IgG control (C). Phase images were recorded using a Nikon TE300/U, immunostaining was recorded using a Leica DMIRB. Scale bar = 100  $\mu$ M. HGF, hepatocyte growth factor; OSM, Oncostatin M. Results are presented as a mean of 4 fields of view  $\pm$  SE.

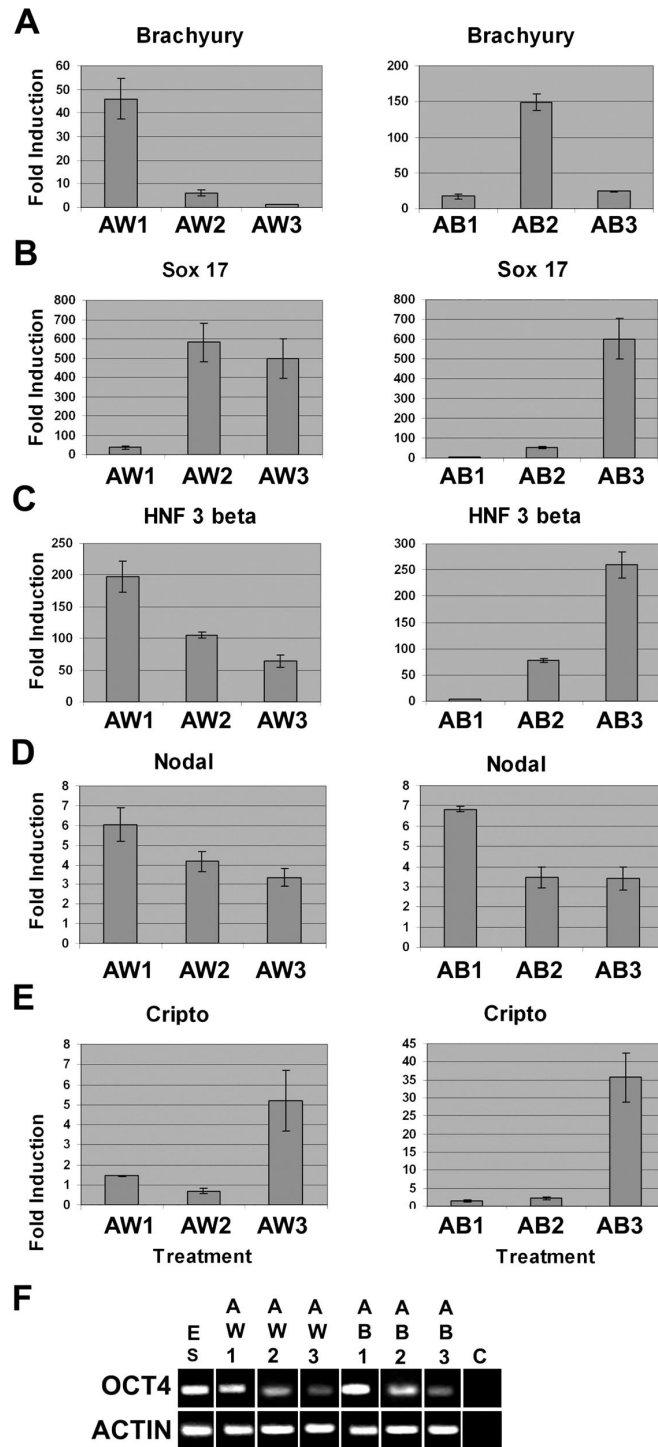

**Fig. S2.** AW treatment promotes accelerated progression of cells through the PS. hESC-directed mesoderm and endoderm differentiation was monitored by qPCR to *Brachyury*, *SOX17*, and *HNF3 $\beta$* . Cells differentiated with AW proceeded through mesoendoderm differentiation more rapidly than cells differentiated with AB. AW treatment exhibited rapid down-regulation of the mesoderm marker *Brachyury* (A, AW1–3 and AB1–3) and more rapid progression through the PS (*SOX17*, *HNF3 $\beta$* ) than cells exposed to AB (B and C, AW1–3 and AB1–3). (D) *Nodal* levels decreased over the 3-day time course in both models (AW1–3 and AB1–3). (E) *CRIPTO* levels were maximally expressed at day 3 in both protocols, indicating cellular transition to the endoderm. (F) Down-regulation of the hESC marker *OCT4* was observed in both protocols over the 3-day period and absent in the –RT control. C, qPCR amplicons were measured using an ABI Prism 7900.

**Table S1. Primer sequences and RT-PCR conditions**

| Gene                           | Primer Sequence                                                  | Annealing temperature, °C | Cycles | Size, bp |
|--------------------------------|------------------------------------------------------------------|---------------------------|--------|----------|
| <i>AFP</i>                     | For-AGAACCTGTCACAAGCTGTG<br>Rev-GACAGCAAGCTGAGGATGTC             | 55                        | 30     | 675      |
| <i>ALB</i>                     | For-CCTTTGGCACAATGAAGTGGGTAACC<br>Rev-CAGCAGTCAGCCATTTACCATAGG   | 55                        | 30     | 354      |
| <i>AAT</i>                     | For-AGACCCTTTGAAGTCAAGCGACC<br>Rev-CCATTGCTGAAGACCTTAGTGATGC     | 55                        | 30     | 358      |
| <i>TO</i>                      | For-GGCAGCGAAGAAGACAAATC<br>Rev-TCGAACAGAATCCAATCCC              | 55                        | 30     | 218      |
| <i>HNF4<math>\alpha</math></i> | For-CTGCTCGGAGCCACCAAGAGATCCATG<br>Rev-ATCATCTGCCACGTGATGCTCTGCA | 55                        | 30     | 370      |
| <i>OCT4</i>                    | For-GACAACAATGAAAATCTTCAGGAGA<br>Rev-TTCTGGCGCCGGTTACAGAACCA     | 55                        | 30     | 218      |
| <i>CYP3A4</i>                  | For-CCTTACATATACACACCCCTTG<br>Rev-GGTTGAAGAAGTCCTCCTAAGCT        | 50                        | 35     | 169      |
| <i>TAT</i>                     | For-ACTGTGTTTGGAAACCTGCC<br>Rev-GCAGCCACTTGTGAGAATGA             | 55                        | 30     | 188      |
| <i>APOF</i>                    | For-GGAAGCGATCAAACCTACCA<br>Rev-ATCAGCCTGACAACCAGCTT             | 58                        | 35     | 347      |
| <i>CYP7A1</i>                  | For- CTGCCAATCCTCTTGAGTTCC<br>Rev- ACTCGGTAGCAGAAAGAATACATC      | 57                        | 35     | 387      |
| $\beta$ - <i>ACTIN</i>         | For-TCACCACCACGGCCGAGCG<br>Rev-TCTCCTTCTGCATCCTGTCC              | 58                        | 25     | 350      |

[A]\**AFP*,  $\alpha$  fetoprotein; *ALB*, albumin; *TO*, tryptophan dioxygenase; *HNF4 $\alpha$* , hepatocyte nuclear factor 4  $\alpha$ ; *OCT4*, Octamer 3/4; *CYP3A4*, cytochrome p450 3A4; *TAT*, tyrosine amino transferase; *APOF*, apolipoprotein F; *CYP7A1*, cytochrome p450 7A1;  $\beta$ -*ACTIN*,  $\beta$  actin.

**Table S2. qPCR primer sequences and conditions**

| Gene                           | Primer/probe sequence               |
|--------------------------------|-------------------------------------|
| <i>BRACHYURY</i>               | Applied Biosystems - hs00610079-ml  |
| <i>HNF3<math>\beta</math></i>  | Applied Biosystems - hs00936490-ml  |
| <i>SOX17</i>                   | Applied Biosystems - hs00751752-sl  |
| <i>NODAL</i>                   | Applied Biosystems - hs01080749-ml  |
| <i>CRIPTO</i>                  | Applied Biosystems - hs00414425-ml  |
| <i>ALBUMIN</i>                 | Applied Biosystems - hs 00910225-m1 |
|                                | For-TCCTCGCTGGCTACCCAAT             |
| <i>WNT3</i>                    | Rev-CGGCAGAAGCGCAGTTG               |
|                                | Probe-CCAGGGCCAGGGACCACCAA          |
|                                | For-GCCCGCTCAGCCATGA                |
| <i>WNT3<math>\alpha</math></i> | Rev-CCGTGGCACTTGCACTTGA             |
|                                | Probe-CAGGCCATGCCAGCCACATG          |
|                                | For-ACTTCTGCATGAAGAATGAGAAGGT       |
| <i>WNT11</i>                   | Rev-TCGCTTCCGTTGGATGTCTT            |
|                                | Probe-CCCACGGGACACAAGACAGGCAG       |
|                                | For-GAGTATGCCTGCCGTGTG              |
| <i><math>\beta</math>2M</i>    | Rev-AATCCAAATGCGGCATCT              |
|                                | Probe-CCTCCATGATGCTGCTTACATGTCTC    |

*WNT*, wingless; *HNF3 $\beta$* , hepatocyte nuclear factor 3  $\beta$ ; *SOX17*, SRY (sex-determining region Y)-box 17;  *$\beta$ -2M*,  $\beta$  2 microglobulin.

**Table S3. Immunostaining: primary and secondary antibodies**

| Antigen     | Type       | Source           | Dilution |
|-------------|------------|------------------|----------|
| Wnt3a       | Mo mono    | R&D Systems      | 1/20     |
| DPPIV       | Go poly    | R&D Systems      | 1/1000   |
| Brachyury   | Go poly    | R&D Systems      | 1/100    |
| Albumin     | Mo mono    | Sigma            | 1/500    |
| Albumin     | Rb poly    | AbCam            | 1/600    |
| CK18        | Mo mono    | DAKO             | 1/50     |
| CK19        | Mo mono    | DAKO             | 1/50     |
| hKi67       | Mo mono    | DAKO             | 1/400    |
| Anti-Mo 488 | Rb anti-Mo | Molecular Probes | 1/500    |
| Anti-Go488  | Do anti-Go | Molecular Probes | 1/500    |
| Anti-Mo HRP | Rb anti-Mo | DAKO             | 1/100    |
| Anti-Go HRP | Rb anti-Go | DAKO             | 1/100    |

Mo mono, mouse monoclonal antibody; Go poly, goat polyclonal antibody; Rb anti-Mo, rabbit antimouse; Rb-anti-Go, rabbit antigoat; Do anti-Go, donkey antigoat.
